# Supplementary material
Source: publisher figshare collection journal article supplement (https://future-science-group.figshare.com/ndownloader/files/28657281)

**Supplementary Materials**

**Supplementary Figure S1:** Overall Patient Population – AUC 60-day


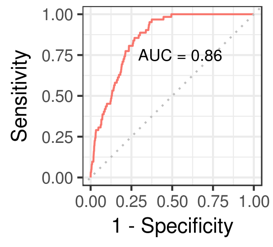


**Supplementary Figure S2**: Overall Patient Population – AUC 90-day


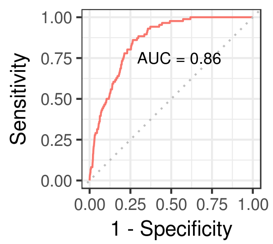


**Supplementary Figure S3**: Overall Patient Population – AUC 180-day


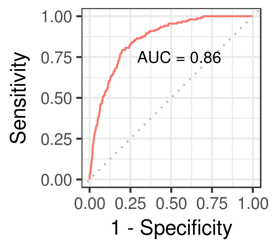


**Supplementary Figure S4**: Subpopulation A – AUC 60-day


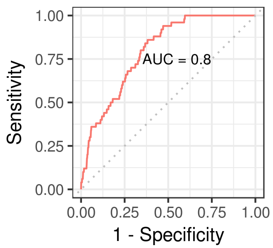


**Supplementary Figure S5**: Subpopulation A – AUC 90-day


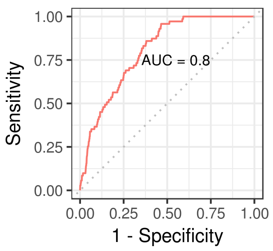


**Supplementary Figure S6**: Subpopulation A – AUC 180-day


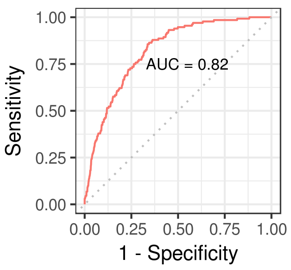


**Supplementary Figure S7**: Subpopulation B – AUC 60-day


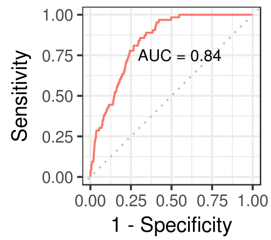


**Supplementary Figure S8**: Subpopulation B – AUC 90-day


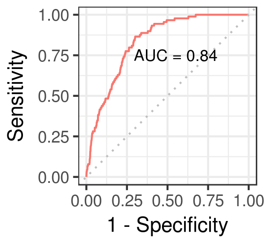


**Supplementary Figure S9**: Subpopulation B – AUC 180-day


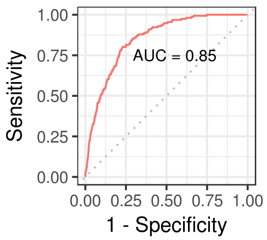

Supplement: Supplementary file 1 [file 28657281]
